# Supplementary material for: Xenopatients show the need for precision medicine approach to chemotherapy in ovarian cancer
Source: PubMed Central journal article supplement (PMC5041973; doi:10.18632/oncotarget.8325), 2016-03-24
Supplement: oncotarget-07-26181-s001.pdf [file oncotarget-07-26181-s001.pdf]

SUPPLEMENTARY FIGURES

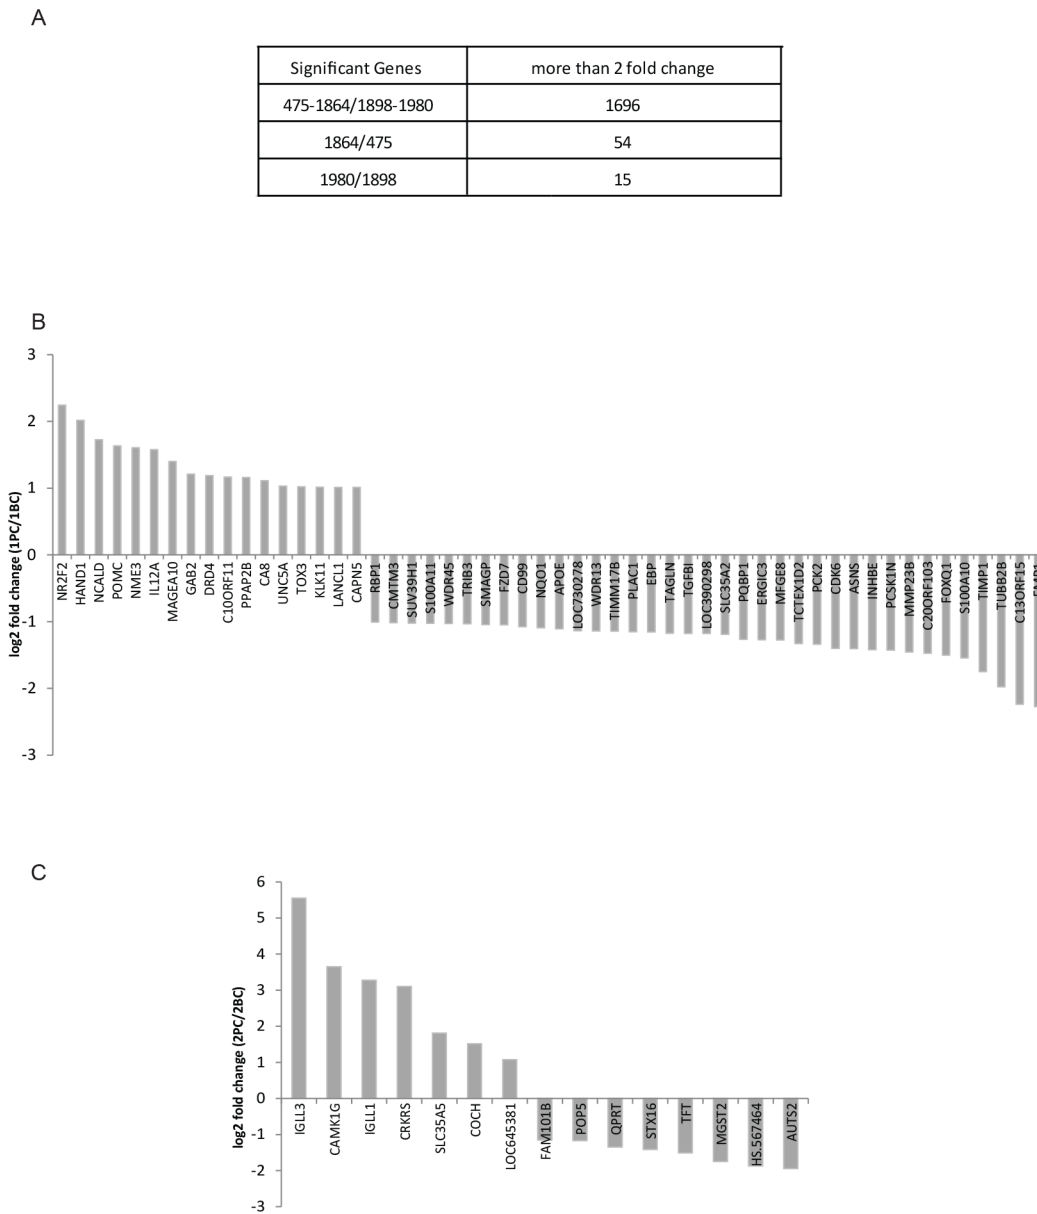

**Supplementary Figure S1: Differentially expressed genes from the comparison of the PDX lines. A.** Number of genes differentially expressed more than 2 fold as from the indicated comparisons; **B.** bar chart of the 54 genes differentially expressed more than 2 fold in the #1PC PDXs versus the #1BC PDXs; **C.** bar chart of the 15 differentially expressed more than 2 fold in the #2PC PDXs versus #2BC PDXs.

## Diseases and Bio Functions

| Categories                                                    | Functions                | Diseases or Functions Annotation  | p-Value  | Molecules                                                                                                                                                                             | # Molecules |
|---------------------------------------------------------------|--------------------------|-----------------------------------|----------|---------------------------------------------------------------------------------------------------------------------------------------------------------------------------------------|-------------|
| Cellular Movement                                             | cell movement            | cell movement                     | 2.37E-07 | S100A11, CD99, APOE, GAB2, IL12A, TGFB1, UNC5A, NR2F2, NQO1, CDK6, HAND1, POMC, ASNS, RBP1, TUBB2B, PLAC1, TIMP1, PPAP2B, FOXQ1, S100A10, FZD7                                        | 21          |
| Cellular Growth and Proliferation                             | proliferation            | proliferation of cells            | 9.57E-07 | S100A11, GAB2, APOE, CD99, IL12A, UNC5A, SUV39H1, NR2F2, HAND1, MFG8, POMC, ASNS, RBP1, PCK2, PLAC1, TIMP1, S100A10, TGFB1, NQO1, CDK6, TRIB3, PCSK1N, EMP1, NME3, TAGLN, FOXQ1, FZD7 | 27          |
| Cellular Movement                                             | migration                | migration of cells                | 4.79E-06 | S100A11, CD99, GAB2, APOE, IL12A, TGFB1, NR2F2, NQO1, CDK6, POMC, ASNS, TUBB2B, PLAC1, TIMP1, PPAP2B, FOXQ1, S100A10, FZD7                                                            | 18          |
| Cancer, Organismal Injury and Abnormalities                   | advanced malignant tumor | advanced malignant tumor          | 2.45E-05 | EMP1, S100A11, CD99, APOE, KLK11, IL12A, TIMP1, PPAP2B, NR2F2, CDK6, FZD7                                                                                                             | 11          |
| Metabolic Disease                                             | amyloidosis              | amyloidosis                       | 2.62E-05 | APOE, GAB2, EBP, TGFB1, TIMP1, NQO1, TAGLN, MFG8, DRD4                                                                                                                                | 9           |
| Cancer, Organismal Injury and Abnormalities, Tumor Morphology | progression              | progression of malignant tumor    | 2.70E-05 | APOE, TIMP1, NR2F2, CDK6                                                                                                                                                              | 4           |
| Cellular Development, Cellular Growth and Proliferation       | proliferation            | proliferation of tumor cell lines | 2.84E-05 | CD99, GAB2, IL12A, SUV39H1, NQO1, CDK6, HAND1, POMC, TRIB3, ASNS, EMP1, PLAC1, PCK2, FOXQ1, S100A10                                                                                   | 15          |
| Metabolic Disease                                             | metabolism               | abnormal metabolism               | 3.75E-05 | APOE, NQO1, FOXQ1, POMC, S100A10                                                                                                                                                      | 5           |
| Cellular Movement, Immune Cell Trafficking                    | invasion                 | invasion of leukocytes            | 3.85E-05 | TIMP1, NQO1, S100A10                                                                                                                                                                  | 3           |
| Cardiovascular System Development and Function                | neovascularization       | neovascularization                | 4.53E-05 | APOE, IL12A, TIMP1, MFG8, S100A10                                                                                                                                                     | 5           |
| Cancer, Organismal Injury and Abnormalities                   | metastasis               | metastasis                        | 5.22E-05 | EMP1, S100A11, CD99, APOE, IL12A, TIMP1, PPAP2B, NR2F2, CDK6, FZD7                                                                                                                    | 10          |
| Lipid Metabolism, Small Molecule Biochemistry                 | regulation               | regulation of lipid               | 7.28E-05 | APOE, POMC, RBP1                                                                                                                                                                      | 3           |
| Organismal Injury and Abnormalities, Tissue Morphology        | quantity                 | quantity of lesion                | 8.02E-05 | APOE, IL12A, TIMP1, NQO1, MFG8                                                                                                                                                        | 5           |

**Supplementary Figure S2: Ingenuity Pathway Analysis (IPA) of the genes differentially expressed more than 2 fold in the #1PC PDXs versus #1BC PDXs.** Over-represented IPA Diseases and Biological Functions associated to 49 out of 54 genes differentially expressed.
